# Supplementary material
Source: publisher figshare collection journal article supplement (https://frontiersin.figshare.com/ndownloader/files/28892004)
Supplement: Supplementary file 1 [file 28892004]

**Table 1S. Rain gauge measurements and amount of precipitation recovered from TAMUG OCSB Roof.**

| <b>Date</b> | <b>Rain Gauge (mm)</b> | <b>Precipitation Recovered (L)</b> |
|-------------|------------------------|------------------------------------|
| 1/29/2020   | 2                      | 0.3                                |
| 2/13/2020   | 32                     | 2.5                                |
| 2/21/2020   | 2                      | 0.25                               |

**Table 2S. Rainfall data from Scholes Field and Dickinson Station obtained from National Weather Service (NWS). Note: The highest event for February for the Dickinson Station was after the sampling event was collected, so is subtracted from the Monthly total for February.**

| <b>Station</b>             | <b>Scholes Field<br/>(Lower Bay)</b> | <b>Dickinson<br/>(Middle Bay)</b> |
|----------------------------|--------------------------------------|-----------------------------------|
| <b>January 2020 Total</b>  | 200.66 mm                            | 153.92 mm                         |
| <b>Jan. Highest Event</b>  | 93.98 mm (Jan. 26)                   | 37.59 mm (Jan. 11)                |
| <b>February 2020 Total</b> | 38.35 mm                             | 17.3* (41.40 mm)                  |
| <b>Feb. Highest Event</b>  | 19.30 mm (Feb. 12)                   | 24.1 (Feb. 24)                    |

**Table 3S. Water sample collection data from the middle bay and lower bay site.**

| <b>Lower Bay</b>  |                       |                    |                                     |                       |                           |
|-------------------|-----------------------|--------------------|-------------------------------------|-----------------------|---------------------------|
| <b>Date</b>       | <b>Time Collected</b> | <b>Tidal Phase</b> | <b>Wind Speed &amp; Gusts (m/s)</b> | <b>Wind Direction</b> | <b>Average TSS (mg/L)</b> |
| <b>1/29/2020</b>  | 3:00 PM               | flood              | 6-7 m/s& 10 m/s gusts               | WNW                   | 90                        |
| <b>2/21/2020</b>  | 4:45 PM               | flood              | 6 m/s& 7.5 m/s gusts                | NNE                   | 110                       |
| <b>Middle Bay</b> |                       |                    |                                     |                       |                           |
| <b>Date</b>       | <b>Time Collected</b> | <b>Tidal Phase</b> | <b>Wind Speed &amp; Gusts (m/s)</b> | <b>Wind Direction</b> | <b>Average TSS (mg/L)</b> |
| <b>1/29/2020</b>  | 1:30 PM               | flood              | 6 m/s                               | WNW                   | 109                       |
| <b>2/13/2020</b>  | 2:00 PM - 2:45 PM     | ebb                | 6 m/s & 8 m/s gusts                 | N                     | 114                       |
| <b>2/21/2020</b>  | 3:00 PM               | flood              | 6 m/s & 10 m/s gusts                | NNE                   | 84                        |

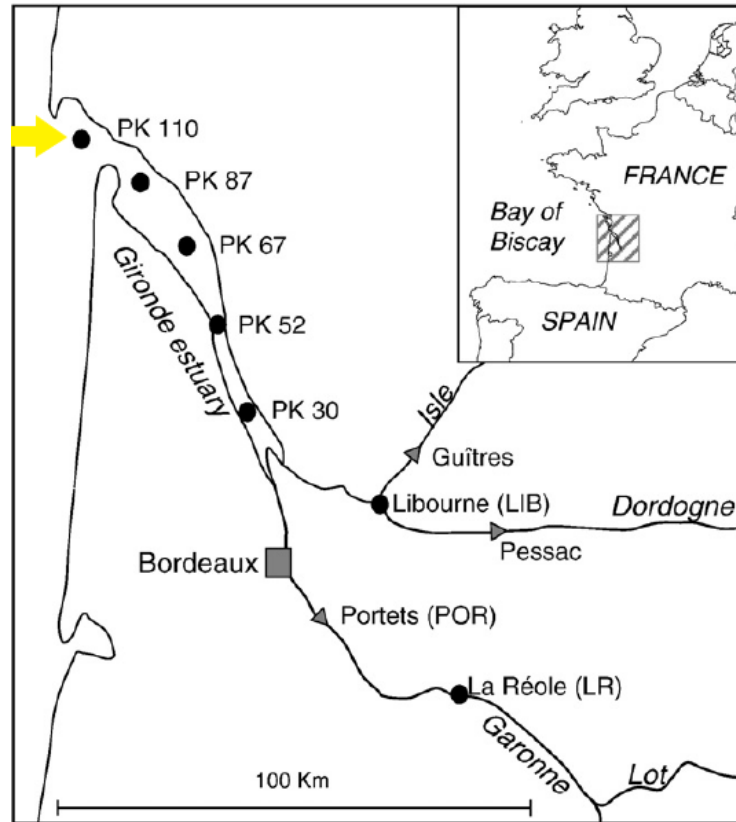

**Figure 1S. Gironde Estuary sampling where particulate sample comparison is located by the blue arrow (Saari et al., 2010).**

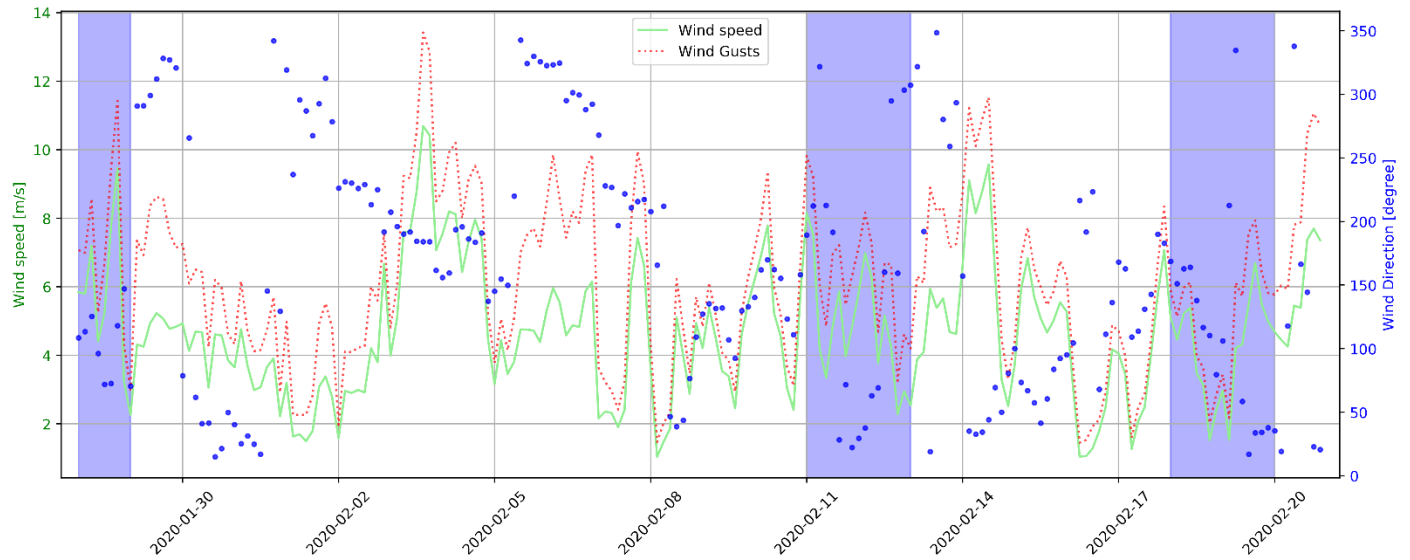

**Figure 2S. Measured wind speed, gusts, and direction from NOAA Eagle Point, TX. Wind speed, gusts (m/s) and wind direction (deg) vs. Time obtained from NOAA Eagle Point, TX station (<https://tidesandcurrents.noaa.gov/met.html?id=8771450>; <https://tidesandcurrents.noaa.gov/met.html?id=8771013>). Shaded area represents cold fronts.**
